# Supplementary material for: Insight into the mechanism of boron-doping of carbon aerogel for enhancing the activity of low-temperature selective catalytic reduction of NO with NH3
Source: Royal Society of Chemistry journal article supplement (doi:10.1039/d0cy02006k), 2021-01-01
Supplement: d0cy02006k1.pdf [file d0cy02006k1.pdf]

## Supplementary Information

Insight into the mechanism of boron-doping of carbon aerogel for  
enhancing the activity of low-temperature selective catalytic  
reduction of NO with NH<sub>3</sub>

Minghe Yang<sup>a</sup>, He Wang<sup>a</sup>, Shuangling Jin<sup>a\*</sup>, Rui Zhang<sup>a\*</sup>, Yan Wang<sup>a</sup>, Wanying Huo<sup>a</sup>,  
Xiaorui Wang<sup>a</sup>, Minglin Jin<sup>a</sup>, Wenming Qiao<sup>b</sup> and Licheng Ling<sup>b</sup>

<sup>a</sup>School of Materials Science and Engineering, Shanghai Institute of Technology,  
Shanghai, 201418, PR China

<sup>b</sup>State Key Laboratory of Chemical Engineering, East China University of Science and  
Technology, Shanghai, 200237, China

\*Corresponding Authors:

Shuangling Jin, E-mail: [jinshuangling@sit.edu.cn](mailto:jinshuangling@sit.edu.cn)

Rui Zhang, E-mail: [zhangrui@sit.edu.cn](mailto:zhangrui@sit.edu.cn)

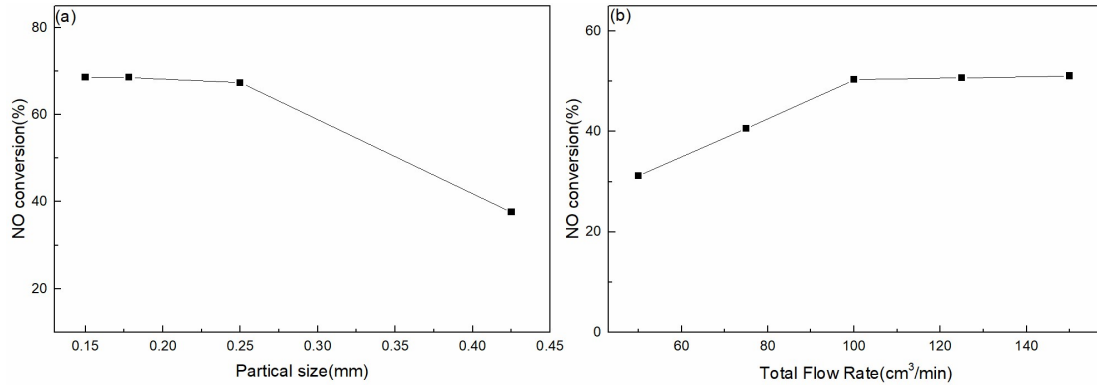

**Fig. S1.** (a) Eliminate internal diffusion by changing the catalyst pellets size (b) Eliminate external diffusion by changing the flow rate and volume of catalyst. Reaction conditions: [NO] = 500 ppm, [NH<sub>3</sub>] = 500 ppm, [O<sub>2</sub>] = 5%, N<sub>2</sub> balance, T = 200 °C, GHSV = 2000 h<sup>-1</sup>.

## S2. Mears Criterion for External Diffusion and Internal Diffusion

### Mears Criterion for External Diffusion (Fogler, p841; Mears, 1971)

$$\text{If } \frac{-r_A' \rho_b R n}{k_c C_{Ab}} < 0.15, \text{ then external mass transfer effects can be neglected.}$$

$-r_A'$  = reaction rate, kmol/kg-cat · s

n = reaction order

R = catalyst particle radius, m

$\rho_b$  = bulk density of catalyst bed, kg/m<sup>3</sup>

= (1- $\phi$ ) ( $\phi$  = porosity or void fraction of packed bed)

$C_{Ab}$  = bulk gas concentration of A, kmol/m<sup>3</sup>

$k_c$  = mass transfer coefficient, m/s

$$\frac{-r_A' \rho_b R n}{k_c C_{Ab}} = [1.33 \times 10^{-7} \text{ kmol-C}_3\text{/kg-cat. s}] [400 \text{ kg/m}^3] [1.3 \times 10^{-5} \text{ m}] [1] / ([8.306 \text{ m/s}] * [0.005 \text{ kmol/m}^3]) = 1.148 \times 10^{-6} < 0.15 \quad \{\text{Mears for External Diffusion}\}$$

### Weisz-Prater Criterion for Internal Diffusion (Fogler, p839)

$$\text{If } C_{WP} = \frac{-r_{A(obs)}' \rho_c R^2}{D_e C_{As}} < 1, \text{ then internal mass transfer effects can be neglected.}$$

$-r_{A(obs)}'$  = observed reaction rate, kmol/kg-cat · s

R = catalyst particle radius, m

$\rho_c$  = solid catalyst density, kg/m<sup>3</sup>; [ $\rho_c$ , anatase or rutile = 4000 kg/m<sup>3</sup>]

$D_e$  = effective gas-phase diffusivity, m<sup>2</sup>/s [Fogler, p815]

$$= \frac{D_{AB}\phi_p\sigma_c}{\tau} \text{ where}$$

$D_{AB}$  = gas-phase diffusivity m<sup>2</sup>/s;  $\phi_p$  = pellet porosity;  $\sigma_c$  = constriction factor;  $\tau$  = tortuosity.

$C_{As}$  = gas concentration of A at the catalyst surface, kmol-A/m<sup>3</sup>

$$C_{WP} = \frac{-r'_{A(obs)}\rho_c R^2}{D_e C_{As}} = [1.33 \times 10^{-7} \text{ kmol-C}^3/\text{kg-cat} \cdot \text{s}] \times [2.34 \times 10^5 \text{ kg-cat}/\text{m}^3] \times [1.3 \times 10^{-5} \text{ m}]^2 / ([5.76 \times 10^{-5} \text{ m}^2/\text{s}] \times [0.005 \text{ kmol-C}^3/\text{m}^3]) = \mathbf{1.83 \times 10^{-5} < 1}$$

{Weisz-Prater Criterion for Internal Diffusion}

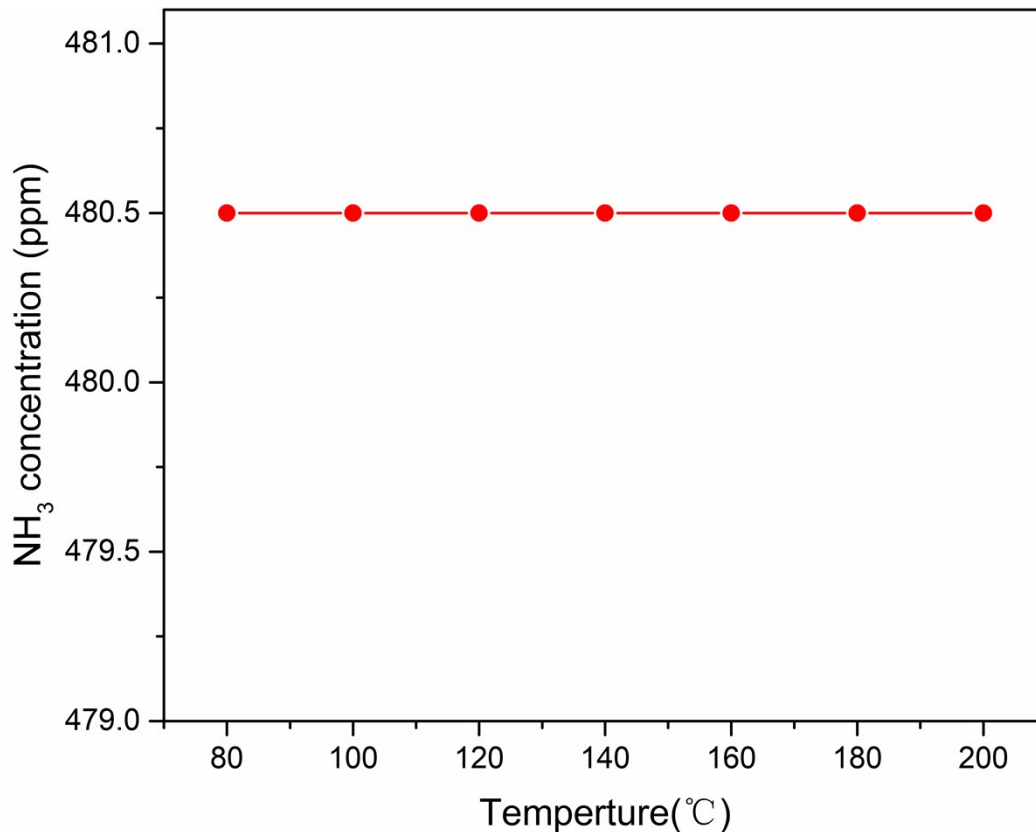

Fig. S3. NH<sub>3</sub> concentration curve of B-CA sample catalyst under NH<sub>3</sub>+O<sub>2</sub>. (reaction conditions: [NH<sub>3</sub>] = 500 ppm, [O<sub>2</sub>] = 5%, N<sub>2</sub> balance, GHSV = 2000 h<sup>-1</sup>).

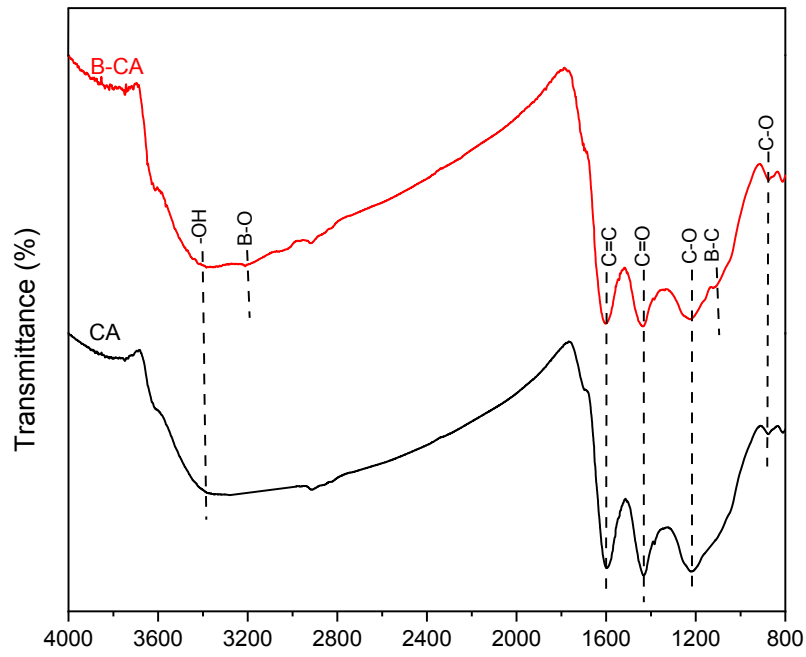

Fig. S4. FTIR spectra of CA and B-CA.

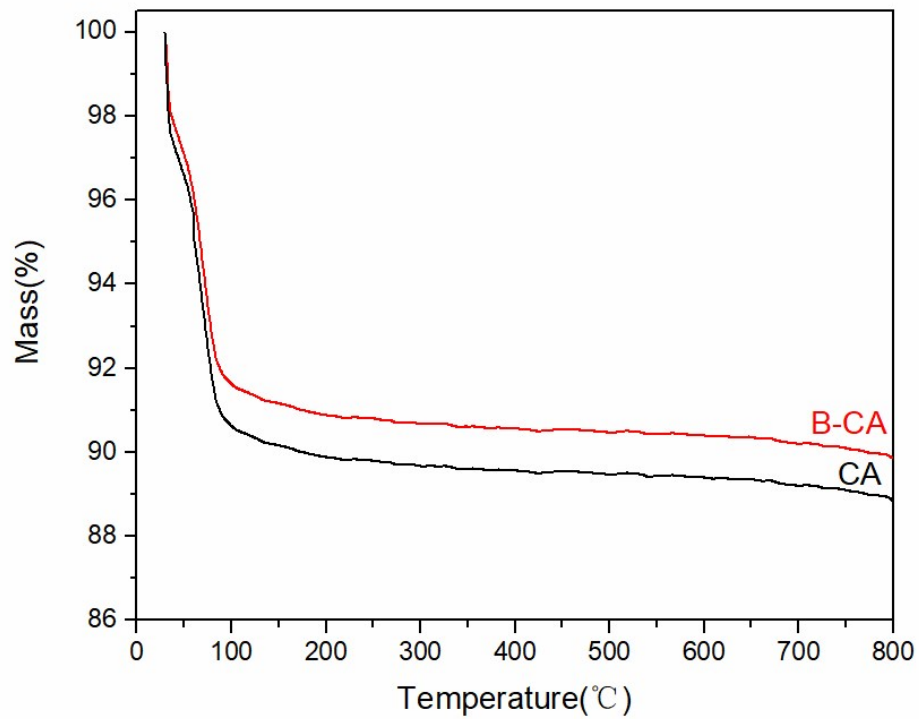

Fig. S5. The Thermogravimetry (TG) curves of sample B-CA and CA.

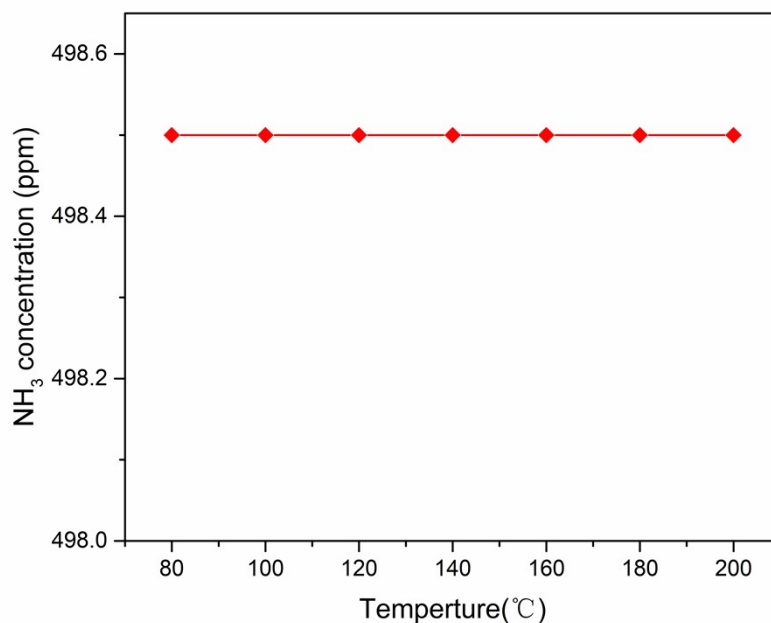

Fig. S6. NH<sub>3</sub> concentration curve of B-CA sample catalyst under NH<sub>3</sub>+O<sub>2</sub>. (reaction conditions: [NH<sub>3</sub>] = 500 ppm, [O<sub>2</sub>] = 5%, N<sub>2</sub> balance, GHSV = 2000 h<sup>-1</sup>).

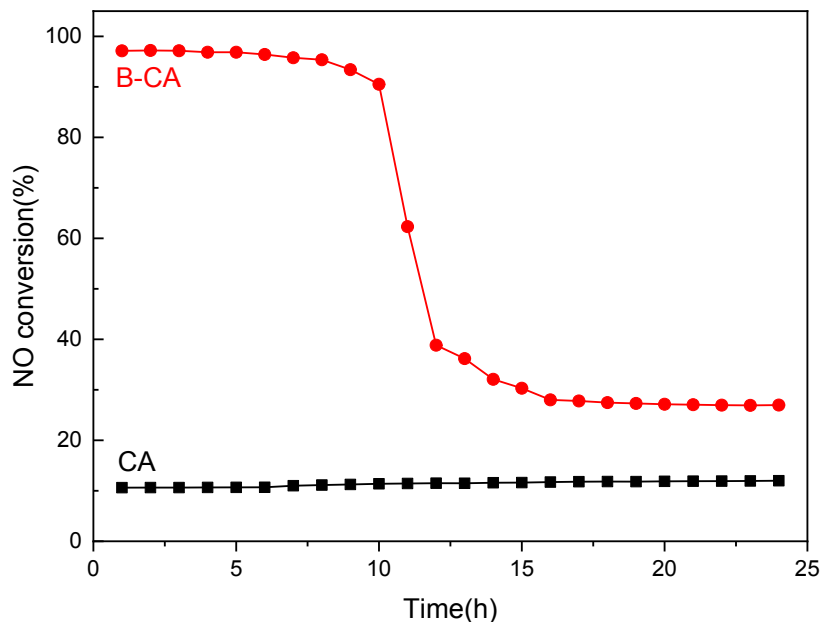

Fig. S7. Stability test of NH<sub>3</sub>-SCR for the CA and B-CA sample.

**S8.** Archive entries for the calculations of the geometric model of stable adsorption of NH<sub>3</sub>, NO, O<sub>2</sub> at different adsorption sites of BC3, BC2O, BCO2 on BCA.

BC3-O<sub>2</sub>:

# opt freq ub3lyp/6-31g(d) scf=(maxcycle=500,xqc)

Title Card Required

0 2

|   |             |             |             |
|---|-------------|-------------|-------------|
| C | 1.15181200  | 6.23248200  | 0.05949400  |
| C | 3.23923800  | 4.90454400  | 0.06153500  |
| C | 5.33091400  | 3.59067400  | 0.06210600  |
| C | 7.42375400  | 2.27761600  | 0.06109200  |
| C | 9.52156500  | 0.95903300  | 0.05896800  |
| C | -0.20465600 | 6.28365500  | 0.04651400  |
| C | -1.00360700 | 5.08306800  | 0.02228700  |
| C | 1.85650100  | 4.97427100  | 0.04934700  |
| C | 1.08083600  | 3.75809500  | 0.02552700  |
| C | 3.93300200  | 3.66396500  | 0.05058800  |
| C | 3.16517300  | 2.44609600  | 0.02646600  |
| C | 6.01786400  | 2.35589500  | 0.05001700  |
| C | 5.25282400  | 1.13629800  | 0.02513000  |
| C | 8.10286200  | 1.04331400  | 0.04801100  |
| C | 7.34296300  | -0.17195100 | 0.02256200  |
| C | 10.16576400 | -0.27527400 | 0.04517500  |
| C | 9.43552700  | -1.46073600 | 0.02012900  |
| C | -2.38654300 | 5.11787700  | 0.00728800  |
| C | -3.16996700 | 3.93286000  | -0.01672900 |
| C | -0.32750700 | 3.81023900  | 0.01253900  |
| C | -1.09393900 | 2.60317200  | -0.00964600 |
| C | 1.75127200  | 2.49803600  | 0.01476200  |
| C | 0.98988500  | 1.28844400  | -0.00826000 |
| C | 3.83466000  | 1.18855000  | 0.01404200  |
| C | 3.07530200  | -0.01919200 | -0.01014800 |
| C | 5.92202700  | -0.12056500 | 0.01148500  |
| C | 5.16332500  | -1.32601400 | -0.01380800 |
| C | 8.01518300  | -1.43917100 | 0.00823100  |
| C | 7.24896800  | -2.62052300 | -0.01742500 |
| C | -4.56548900 | 3.97067000  | -0.03744000 |
| C | -5.34335900 | 2.79226700  | -0.06566600 |
| C | -2.50620300 | 2.65408400  | -0.02280300 |
| C | -3.27339100 | 1.44679700  | -0.04124300 |
| C | -0.42763600 | 1.33870000  | -0.02031500 |
| C | -1.18866100 | 0.13325100  | -0.03976400 |
| C | 1.65618500  | 0.03011600  | -0.01999300 |
| C | 0.89415300  | -1.17682300 | -0.04249900 |
| C | 3.74744000  | -1.27749600 | -0.02404100 |
| C | 2.98810100  | -2.48328600 | -0.04990000 |
| C | 5.83920700  | -2.59677600 | -0.02903500 |
| C | 5.06972400  | -3.77807200 | -0.05579600 |
| C | -6.73970700 | 2.84236500  | -0.09836700 |

|   |              |             |             |
|---|--------------|-------------|-------------|
| C | -7.53824200  | 1.68151300  | -0.14812500 |
| C | -4.69443700  | 1.50419300  | -0.06473400 |
| C | -5.46229100  | 0.30290500  | -0.07198200 |
| C | -2.60884600  | 0.18537500  | -0.04779600 |
| C | -3.38956600  | -1.01446900 | -0.04326500 |
| C | -0.52252700  | -1.12784300 | -0.04842400 |
| C | -1.28991300  | -2.34197800 | -0.07045600 |
| C | 1.57206600   | -2.43611100 | -0.05861400 |
| C | 0.81696500   | -3.64507000 | -0.08730800 |
| C | 3.66740500   | -3.75145600 | -0.06708200 |
| C | 2.89270800   | -4.93949900 | -0.09589700 |
| C | -8.95144600  | 1.80561000  | -0.22845900 |
| C | -9.74878400  | 0.68902400  | -0.32803200 |
| C | -6.92371200  | 0.38219600  | -0.13882200 |
| C | -7.77367900  | -0.75651200 | -0.23923200 |
| C | -4.79753800  | -0.94494400 | -0.01964300 |
| C | -2.70743600  | -2.29681200 | -0.06924500 |
| C | -3.43590700  | -3.55505700 | -0.11424100 |
| C | -0.59606200  | -3.60069600 | -0.09556300 |
| C | -1.33696200  | -4.83437700 | -0.12829500 |
| C | 1.50828200   | -4.91295200 | -0.10703600 |
| C | 0.72981900   | -6.12537200 | -0.13785700 |
| C | -9.14970800  | -0.58343200 | -0.34515600 |
| C | -7.22311900  | -2.15820000 | -0.19999100 |
| C | -4.82901700  | -3.57201800 | -0.17678900 |
| C | -2.71584300  | -4.77967200 | -0.13208800 |
| C | -0.62518400  | -6.08685800 | -0.14882600 |
| H | 9.94630700   | -2.41988900 | 0.00942800  |
| H | 7.75922300   | -3.58089500 | -0.02866000 |
| H | 5.57964900   | -4.73854200 | -0.06822600 |
| H | 3.40714800   | -5.89760900 | -0.10957000 |
| H | 1.25866200   | -7.07482400 | -0.15222600 |
| H | -9.77682700  | -1.46770300 | -0.43029800 |
| H | -7.70573700  | -2.78964300 | -0.95520200 |
| H | -5.30754100  | -4.55188500 | -0.19503200 |
| H | -3.28784300  | -5.70439100 | -0.15317400 |
| H | -1.20705200  | -7.00465000 | -0.17167000 |
| H | -2.89811000  | 6.07782200  | 0.01326000  |
| H | -5.07216400  | 4.93298600  | -0.03354600 |
| H | -7.23061500  | 3.81326300  | -0.10297200 |
| H | -9.38605800  | 2.80218200  | -0.22355400 |
| H | -10.82873300 | 0.78472700  | -0.39858100 |
| H | -0.72015900  | 7.24082900  | 0.05427500  |
| H | 11.25164900  | -0.31380000 | 0.05403800  |

|   |             |             |            |
|---|-------------|-------------|------------|
| H | 8.00254600  | 3.19811000  | 0.08017600 |
| H | 10.10073300 | 1.87845100  | 0.07842100 |
| H | 1.73799700  | 7.14790900  | 0.07788100 |
| H | 3.81949400  | 5.82450800  | 0.07980400 |
| H | 5.90878600  | 4.51184800  | 0.08066600 |
| B | -5.65489500 | -2.26704900 | 0.09740600 |
| O | -6.06165500 | -2.66901100 | 1.55279600 |
| O | -7.46225100 | -2.77121300 | 1.12257500 |

BC3-NO:

# opt freq ub3lyp/6-31g(d) scf=(maxcycle=500,xqc)

Title Card Required

0 2

|   |             |             |             |
|---|-------------|-------------|-------------|
| C | 1.15181200  | 6.23248200  | 0.05949400  |
| C | 3.23923800  | 4.90454400  | 0.06153500  |
| C | 5.33091400  | 3.59067400  | 0.06210600  |
| C | 7.42375400  | 2.27761600  | 0.06109200  |
| C | 9.52156500  | 0.95903300  | 0.05896800  |
| C | -0.20465600 | 6.28365500  | 0.04651400  |
| C | -1.00360700 | 5.08306800  | 0.02228700  |
| C | 1.85650100  | 4.97427100  | 0.04934700  |
| C | 1.08083600  | 3.75809500  | 0.02552700  |
| C | 3.93300200  | 3.66396500  | 0.05058800  |
| C | 3.16517300  | 2.44609600  | 0.02646600  |
| C | 6.01786400  | 2.35589500  | 0.05001700  |
| C | 5.25282400  | 1.13629800  | 0.02513000  |
| C | 8.10286200  | 1.04331400  | 0.04801100  |
| C | 7.34296300  | -0.17195100 | 0.02256200  |
| C | 10.16576400 | -0.27527400 | 0.04517500  |
| C | 9.43552700  | -1.46073600 | 0.02012900  |
| C | -2.38654300 | 5.11787700  | 0.00728800  |
| C | -3.16996700 | 3.93286000  | -0.01672900 |
| C | -0.32750700 | 3.81023900  | 0.01253900  |
| C | -1.09393900 | 2.60317200  | -0.00964600 |
| C | 1.75127200  | 2.49803600  | 0.01476200  |
| C | 0.98988500  | 1.28844400  | -0.00826000 |
| C | 3.83466000  | 1.18855000  | 0.01404200  |
| C | 3.07530200  | -0.01919200 | -0.01014800 |
| C | 5.92202700  | -0.12056500 | 0.01148500  |
| C | 5.16332500  | -1.32601400 | -0.01380800 |
| C | 8.01518300  | -1.43917100 | 0.00823100  |
| C | 7.24896800  | -2.62052300 | -0.01742500 |
| C | -4.56548900 | 3.97067000  | -0.03744000 |
| C | -5.34335900 | 2.79226700  | -0.06566600 |
| C | -2.50620300 | 2.65408400  | -0.02280300 |



|   |             |             |             |
|---|-------------|-------------|-------------|
| C | -3.27339100 | 1.44679700  | -0.04124300 |
| C | -0.42763600 | 1.33870000  | -0.02031500 |
| C | -1.18866100 | 0.13325100  | -0.03976400 |
| C | 1.65618500  | 0.03011600  | -0.01999300 |
| C | 0.89415300  | -1.17682300 | -0.04249900 |
| C | 3.74744000  | -1.27749600 | -0.02404100 |
| C | 2.98810100  | -2.48328600 | -0.04990000 |
| C | 5.83920700  | -2.59677600 | -0.02903500 |
| C | 5.06972400  | -3.77807200 | -0.05579600 |
| C | -6.73970700 | 2.84236500  | -0.09836700 |
| C | -7.53824200 | 1.68151300  | -0.14812500 |
| C | -4.69443700 | 1.50419300  | -0.06473400 |
| C | -5.46229100 | 0.30290500  | -0.07198200 |
| C | -2.60884600 | 0.18537500  | -0.04779600 |
| C | -3.38956600 | -1.01446900 | -0.04326500 |
| C | -0.52252700 | -1.12784300 | -0.04842400 |
| C | -1.28991300 | -2.34197800 | -0.07045600 |
| C | 1.57206600  | -2.43611100 | -0.05861400 |
| C | 0.81696500  | -3.64507000 | -0.08730800 |
| C | 3.66740500  | -3.75145600 | -0.06708200 |
| C | 2.89270800  | -4.93949900 | -0.09589700 |
| C | -8.95144600 | 1.80561000  | -0.22845900 |
| C | -9.74878400 | 0.68902400  | -0.32803200 |
| C | -6.92371200 | 0.38219600  | -0.13882200 |
| C | -7.77367900 | -0.75651200 | -0.23923200 |
| C | -4.79753800 | -0.94494400 | -0.01964300 |
| C | -2.70743600 | -2.29681200 | -0.06924500 |
| C | -3.43590700 | -3.55505700 | -0.11424100 |
| C | -0.59606200 | -3.60069600 | -0.09556300 |
| C | -1.33696200 | -4.83437700 | -0.12829500 |
| C | 1.50828200  | -4.91295200 | -0.10703600 |
| C | 0.72981900  | -6.12537200 | -0.13785700 |
| C | -9.14970800 | -0.58343200 | -0.34515600 |
| C | -7.22311900 | -2.15820000 | -0.19999100 |
| C | -4.82901700 | -3.57201800 | -0.17678900 |
| C | -2.71584300 | -4.77967200 | -0.13208800 |
| C | -0.62518400 | -6.08685800 | -0.14882600 |
| H | 9.94630700  | -2.41988900 | 0.00942800  |
| H | 7.75922300  | -3.58089500 | -0.02866000 |
| H | 5.57964900  | -4.73854200 | -0.06822600 |
| H | 3.40714800  | -5.89760900 | -0.10957000 |
| H | 1.25866200  | -7.07482400 | -0.15222600 |
| H | -9.77682700 | -1.46770300 | -0.43029800 |
| H | -7.70573700 | -2.78964300 | -0.95520200 |

|   |              |             |             |
|---|--------------|-------------|-------------|
| H | -5.30754100  | -4.55188500 | -0.19503200 |
| H | -3.28784300  | -5.70439100 | -0.15317400 |
| H | -1.20705200  | -7.00465000 | -0.17167000 |
| H | -2.89811000  | 6.07782200  | 0.01326000  |
| H | -5.07216400  | 4.93298600  | -0.03354600 |
| H | -7.23061500  | 3.81326300  | -0.10297200 |
| H | -9.38605800  | 2.80218200  | -0.22355400 |
| H | -10.82873300 | 0.78472700  | -0.39858100 |
| H | -0.72015900  | 7.24082900  | 0.05427500  |
| H | 11.25164900  | -0.31380000 | 0.05403800  |
| H | 8.00254600   | 3.19811000  | 0.08017600  |
| H | 10.10073300  | 1.87845100  | 0.07842100  |
| H | 1.73799700   | 7.14790900  | 0.07788100  |
| H | 3.81949400   | 5.82450800  | 0.07980400  |
| H | 5.90878600   | 4.51184800  | 0.08066600  |
| B | -5.65489500  | -2.26704900 | 0.09740600  |
| O | -6.06165500  | -2.66901100 | 1.55279600  |
| O | -7.46225100  | -2.77121300 | 1.12257500  |

BC3-NH<sub>3</sub>:

# opt freq ub3lyp/6-31g(d) scf=(maxcycle=500,xqc)

Title Card Required

0 2

|   |              |             |             |
|---|--------------|-------------|-------------|
| C | -0.92513800  | 6.21581800  | 0.08231200  |
| C | -3.03577100  | 4.92482300  | 0.09123300  |
| C | -5.15017300  | 3.64781600  | 0.10035900  |
| C | -7.26592000  | 2.37243100  | 0.10935200  |
| C | -9.38742900  | 1.09288400  | 0.11822000  |
| C | 0.43190500   | 6.24356200  | 0.05772600  |
| C | 1.20985600   | 5.02955900  | 0.01484800  |
| C | -1.65235100  | 4.97036800  | 0.06660700  |
| C | -0.89842000  | 3.74090300  | 0.02373800  |
| C | -3.75160400  | 3.69630900  | 0.07557700  |
| C | -3.00599200  | 2.46529100  | 0.03272200  |
| C | -5.85914400  | 2.42510900  | 0.08456800  |
| C | -5.11652600  | 1.19263300  | 0.04165000  |
| C | -7.96759400  | 1.15077300  | 0.09334600  |
| C | -7.22974600  | -0.07772300 | 0.05055300  |
| C | -10.05341200 | -0.12965300 | 0.10148900  |
| C | -9.34483000  | -1.32787500 | 0.05992500  |
| C | 2.59267300   | 5.04112600  | -0.01060100 |
| C | 3.35756700   | 3.84298700  | -0.05278400 |
| C | 0.51016800   | 3.76857400  | -0.00167100 |
| C | 1.25462900   | 2.54883400  | -0.04403600 |
| C | -1.59120100  | 2.49262400  | 0.00725300  |

|   |             |             |             |
|---|-------------|-------------|-------------|
| C | -0.85209100 | 1.27061200  | -0.03524400 |
| C | -3.69771800 | 1.22001900  | 0.01612100  |
| C | -2.96051500 | -0.00084400 | -0.02640900 |
| C | -5.80833200 | -0.05206500 | 0.02493000  |
| C | -5.07184100 | -1.27114700 | -0.01758900 |
| C | -7.92449500 | -1.33294000 | 0.03357800  |
| C | -7.17998700 | -2.52767500 | -0.00854200 |
| C | 4.75248700  | 3.85914200  | -0.07842500 |
| C | 5.51213200  | 2.66586900  | -0.12031900 |
| C | 2.66854900  | 2.57537800  | -0.06944900 |
| C | 3.41109700  | 1.35660400  | -0.11148300 |
| C | 0.56656100  | 1.29637000  | -0.06064000 |
| C | 1.30510500  | 0.07691700  | -0.10294300 |
| C | -1.54125600 | 0.02385600  | -0.05185300 |
| C | -0.80205500 | -1.19652000 | -0.09441400 |
| C | -3.65518800 | -1.24770000 | -0.04310800 |
| C | -2.91824900 | -2.46612500 | -0.08566600 |
| C | -5.76978800 | -2.52978200 | -0.03460700 |
| C | -5.02085400 | -3.72403300 | -0.07682200 |
| C | 6.91054600  | 2.68363800  | -0.14577900 |
| C | 7.66859000  | 1.49214300  | -0.18746800 |
| C | 4.83249600  | 1.39184800  | -0.13697100 |
| C | 5.57397900  | 0.17578800  | -0.17865400 |
| C | 2.72470600  | 0.10247200  | -0.12808000 |
| C | 3.47690400  | -1.11493200 | -0.16983100 |
| C | 0.61559700  | -1.17289400 | -0.11962400 |
| C | 1.35869300  | -2.39735700 | -0.16241400 |
| C | -1.50074800 | -2.44283700 | -0.11113200 |
| C | -0.76593600 | -3.66243400 | -0.15390200 |
| C | -3.61817000 | -3.72211300 | -0.10266600 |
| C | -2.86160100 | -4.92277800 | -0.14530500 |
| C | 9.08456900  | 1.54676200  | -0.21255200 |
| C | 9.84801500  | 0.38898600  | -0.25361900 |
| C | 7.00666800  | 0.22392300  | -0.20428800 |
| C | 7.80495000  | -0.97580600 | -0.24741000 |
| C | 4.89373200  | -1.07767000 | -0.19353900 |
| C | 2.78120000  | -2.37518200 | -0.18736900 |
| C | 3.50169900  | -3.63477800 | -0.23147500 |
| C | 0.64798400  | -3.63960300 | -0.17935700 |
| C | 1.37712600  | -4.88091100 | -0.22304900 |
| C | -1.47715200 | -4.91838900 | -0.17084900 |
| C | -0.71309600 | -6.14099100 | -0.21431800 |
| C | 9.21300700  | -0.85290100 | -0.27087400 |
| C | 7.19195900  | -2.25762900 | -0.26690700 |

|   |              |             |             |
|---|--------------|-------------|-------------|
| C | 4.90465300   | -3.66643200 | -0.25883200 |
| C | 2.75677100   | -4.84700400 | -0.24790300 |
| C | 0.64248600   | -6.12186000 | -0.23915400 |
| H | -9.87333500  | -2.27740900 | 0.04715600  |
| H | -7.70788900  | -3.47847600 | -0.02135700 |
| H | -5.54798600  | -4.67526300 | -0.08970400 |
| H | -3.39182600  | -5.87244200 | -0.15815800 |
| H | -1.25443200  | -7.08363100 | -0.22671100 |
| H | 9.80771900   | -1.76257900 | -0.30195700 |
| H | 7.87557100   | -3.10815900 | -0.30229500 |
| H | 5.35790600   | -4.65909000 | -0.29387500 |
| H | 3.31058400   | -5.78293500 | -0.28113800 |
| H | 1.20851400   | -7.04949000 | -0.27185400 |
| H | 3.12015000   | 5.99241900  | 0.00178000  |
| H | 5.27463600   | 4.81307800  | -0.06605900 |
| H | 7.42997100   | 3.63915200  | -0.13333700 |
| H | 9.56824800   | 2.52057000  | -0.19874200 |
| H | 10.93227900  | 0.44873500  | -0.27157900 |
| H | 0.96396200   | 7.19163200  | 0.07004000  |
| H | -11.13973200 | -0.14912300 | 0.12111500  |
| H | -7.82762100  | 3.30315900  | 0.14181500  |
| H | -9.94940800  | 2.02255700  | 0.15069200  |
| H | -1.49487300  | 7.14124200  | 0.11458900  |
| H | -3.59967900  | 5.85456500  | 0.12356900  |
| H | -5.71152900  | 4.57883600  | 0.13275500  |
| B | 5.69608200   | -2.38176800 | -0.24026200 |
| N | 5.88449900   | -2.93190800 | 3.47578100  |
| H | 6.15986000   | -2.96254000 | 2.49374400  |
| H | 5.79620900   | -1.94018900 | 3.69754900  |
| H | 4.93238000   | -3.29741800 | 3.49571500  |

BC2O-O<sub>2</sub>:

# opt freq b3lyp/6-31g(d) scf=(maxcycle=500,xqc)

Title Card Required

0 1

|   |             |            |            |
|---|-------------|------------|------------|
| C | 1.31407500  | 6.25479700 | 0.06872400 |
| C | 3.37347900  | 4.88059000 | 0.07691800 |
| C | 5.43521600  | 3.51310600 | 0.08522500 |
| C | 7.49486200  | 2.14279700 | 0.09354700 |
| C | 9.55737500  | 0.76937100 | 0.10193400 |
| C | -0.03909400 | 6.33587900 | 0.05036300 |
| C | -0.87042100 | 5.15247400 | 0.02003900 |
| C | 1.99950900  | 4.98047500 | 0.05865400 |
| C | 1.19056200  | 3.77950000 | 0.02816000 |
| C | 4.04983100  | 3.61877000 | 0.06660200 |

|   |             |             |             |
|---|-------------|-------------|-------------|
| C | 3.25049200  | 2.41616200  | 0.03567800  |
| C | 6.09913500  | 2.25541500  | 0.07463900  |
| C | 5.30498800  | 1.05351200  | 0.04317600  |
| C | 8.14470300  | 0.88914300  | 0.08269900  |
| C | 7.35658100  | -0.30795200 | 0.05122000  |
| C | 10.17186300 | -0.48003400 | 0.09062800  |
| C | 9.41410200  | -1.64801400 | 0.06001700  |
| C | -2.24664400 | 5.21667400  | 0.00078500  |
| C | -3.06721100 | 4.04450500  | -0.02847100 |
| C | -0.20842400 | 3.86311100  | 0.00959000  |
| C | -1.00384200 | 2.67247000  | -0.01965900 |
| C | 1.84198300  | 2.50250400  | 0.01717600  |
| C | 1.05735000  | 1.31201200  | -0.01358300 |
| C | 3.89055100  | 1.14148600  | 0.02407200  |
| C | 3.10523600  | -0.04940700 | -0.00710200 |
| C | 5.94155500  | -0.22170800 | 0.03161500  |
| C | 5.15404600  | -1.41130600 | 0.00024600  |
| C | 7.99836200  | -1.59314800 | 0.03965900  |
| C | 7.20387000  | -2.75743700 | 0.00852400  |
| C | -4.45456400 | 4.10240900  | -0.05048500 |
| C | -5.26421700 | 2.93188900  | -0.07861800 |
| C | -2.41402300 | 2.75384400  | -0.03713800 |
| C | -3.19882700 | 1.56668400  | -0.06397100 |
| C | -0.35763100 | 1.39774900  | -0.03143800 |
| C | -1.13769200 | 0.21142600  | -0.06086100 |
| C | 1.69334200  | 0.03637800  | -0.02550300 |
| C | 0.90524200  | -1.15466900 | -0.05702600 |
| C | 3.74507000  | -1.32928900 | -0.01901300 |
| C | 2.95707100  | -2.51834600 | -0.05077400 |
| C | 5.79986000  | -2.70120300 | -0.01156000 |
| C | 4.99993500  | -3.86674900 | -0.04289200 |
| C | -6.65867200 | 2.98164500  | -0.10632300 |
| C | -7.45567200 | 1.81473100  | -0.13201400 |
| C | -4.62369500 | 1.63953600  | -0.08173300 |
| C | -5.39626000 | 0.45294200  | -0.10531500 |
| C | -2.54845500 | 0.30105600  | -0.07628200 |
| C | -3.34148300 | -0.88265100 | -0.10699700 |
| C | -0.50086500 | -1.06914800 | -0.07425700 |
| C | -1.28970000 | -2.26144300 | -0.10796700 |
| C | 1.54608100  | -2.43572500 | -0.06985500 |
| C | 0.75873000  | -3.62140300 | -0.10188800 |
| C | 3.60121300  | -3.80717500 | -0.06278100 |
| C | 2.78978200  | -4.97560900 | -0.09423100 |
| C | -8.87533900 | 1.90557000  | -0.16115500 |

|   |              |             |             |
|---|--------------|-------------|-------------|
| C | -9.64982200  | 0.77005800  | -0.18513700 |
| C | -6.83557700  | 0.51843900  | -0.12510200 |
| C | -7.65992900  | -0.64950700 | -0.15112600 |
| C | -4.73589900  | -0.80988600 | -0.11543000 |
| C | -2.70109800  | -2.16884600 | -0.12559300 |
| C | -3.47077500  | -3.35652400 | -0.15756800 |
| C | -0.65567400  | -3.53495700 | -0.12148000 |
| C | -1.46015800  | -4.72139700 | -0.15304100 |
| C | 1.40450200   | -4.90834500 | -0.11366100 |
| C | 0.56937400   | -6.08454800 | -0.14471100 |
| C | -9.03772600  | -0.50209900 | -0.18049900 |
| C | -7.09463800  | -2.05923400 | -0.09775900 |
| C | -2.85500300  | -4.61039100 | -0.17156800 |
| C | -0.78792800  | -5.99598200 | -0.16307400 |
| H | 9.90350000   | -2.61824800 | 0.05145700  |
| H | 7.69355700   | -3.72850700 | -0.00011300 |
| H | 5.48941800   | -4.83792700 | -0.05163400 |
| H | 3.27773100   | -5.94772500 | -0.10272800 |
| H | 1.05461800   | -7.05730600 | -0.15261900 |
| H | -9.65893900  | -1.39390900 | -0.18819100 |
| H | -7.61539200  | -2.72171000 | -0.79574500 |
| H | -3.48371300  | -5.49523800 | -0.19184500 |
| H | -1.39566600  | -6.89679500 | -0.18519100 |
| H | -2.73602400  | 6.18828700  | 0.00815800  |
| H | -4.94606700  | 5.07287300  | -0.04618300 |
| H | -7.15455800  | 3.94988200  | -0.10774900 |
| H | -9.33480800  | 2.89095900  | -0.16416900 |
| H | -10.73343900 | 0.84489700  | -0.20635600 |
| H | -0.53168500  | 7.30509400  | 0.05844800  |
| H | 11.25632500  | -0.54426000 | 0.10592700  |
| H | 8.09881200   | 3.04690300  | 0.11735700  |
| H | 10.16019600  | 1.67336600  | 0.12590200  |
| H | 1.91837200   | 7.15832700  | 0.09168000  |
| H | 3.97493400   | 5.78674700  | 0.10003800  |
| H | 6.03782000   | 4.41819800  | 0.10884100  |
| B | -5.51674100  | -2.10800100 | -0.15703000 |
| O | -4.82807200  | -3.30756100 | -0.17945200 |
| O | -7.41264600  | -2.60315200 | 1.24890800  |
| O | -7.63791900  | -3.92225700 | 1.20534100  |

BC2O-NO:

# opt freq b3lyp/6-31g(d) scf=(maxcycle=500,xqc)

Title Card Required

0 1

|   |             |            |            |
|---|-------------|------------|------------|
| C | -1.27880700 | 6.24287300 | 0.04625000 |
|---|-------------|------------|------------|

|   |              |             |             |
|---|--------------|-------------|-------------|
| C | -3.34053900  | 4.88145900  | 0.03996900  |
| C | -5.40873400  | 3.53129200  | 0.03699900  |
| C | -7.47575000  | 2.17408200  | 0.03681700  |
| C | -9.54087500  | 0.80469300  | 0.03844300  |
| C | 0.07401600   | 6.31599000  | 0.04226600  |
| C | 0.89500500   | 5.12644200  | 0.02527300  |
| C | -1.96651700  | 4.97097900  | 0.03482500  |
| C | -1.16494000  | 3.76500400  | 0.01801900  |
| C | -4.02258700  | 3.62529400  | 0.03082800  |
| C | -3.22792600  | 2.41790500  | 0.01549600  |
| C | -6.08030900  | 2.27991700  | 0.03004600  |
| C | -5.28986100  | 1.07088900  | 0.01614700  |
| C | -8.13086600  | 0.92187900  | 0.03130300  |
| C | -7.34968100  | -0.27920400 | 0.01848600  |
| C | -10.16416800 | -0.44170600 | 0.03349700  |
| C | -9.40947200  | -1.61206000 | 0.02146500  |
| C | 2.26947300   | 5.18339500  | 0.02191500  |
| C | 3.07818700   | 4.00676500  | 0.00328700  |
| C | 0.23380500   | 3.83786100  | 0.01210500  |
| C | 1.02355800   | 2.64151000  | -0.00618600 |
| C | -1.81979300  | 2.49234300  | 0.00810400  |
| C | -1.03642300  | 1.29449500  | -0.00771200 |
| C | -3.87648200  | 1.14721400  | 0.00829100  |
| C | -3.09571900  | -0.04932200 | -0.00534100 |
| C | -5.93442900  | -0.20074000 | 0.01074400  |
| C | -5.15482100  | -1.39138200 | -0.00153600 |
| C | -7.99638300  | -1.55658500 | 0.01384300  |
| C | -7.20309800  | -2.72808000 | 0.00226500  |
| C | 4.46201400   | 4.07223900  | 0.00140200  |
| C | 5.26922000   | 2.90687000  | -0.02164600 |
| C | 2.43201700   | 2.71348600  | -0.01311600 |
| C | 3.21958700   | 1.52252600  | -0.03548200 |
| C | 0.37776500   | 1.36737200  | -0.01696000 |
| C | 1.15940100   | 0.17325800  | -0.03431000 |
| C | -1.68113000  | 0.02301000  | -0.01454900 |
| C | -0.89972600  | -1.17160500 | -0.02766700 |
| C | -3.74444100  | -1.31948300 | -0.00979100 |
| C | -2.96292000  | -2.51420900 | -0.02078100 |
| C | -5.80787400  | -2.67575900 | -0.00514500 |
| C | -5.01061900  | -3.85335000 | -0.01529100 |
| C | 6.65876400   | 2.99001700  | -0.01996100 |
| C | 7.47475700   | 1.84176400  | -0.05181900 |
| C | 4.64153700   | 1.60721700  | -0.04523900 |
| C | 5.42751000   | 0.42483200  | -0.07818500 |

|   |              |             |             |
|---|--------------|-------------|-------------|
| C | 2.57722000   | 0.24630000  | -0.04691700 |
| C | 3.37173200   | -0.94477100 | -0.06774300 |
| C | 0.51377000   | -1.09885200 | -0.03883200 |
| C | 1.30334400   | -2.29764500 | -0.05064400 |
| C | -1.55658200  | -2.44263700 | -0.02970200 |
| C | -0.77161800  | -3.64131500 | -0.03821800 |
| C | -3.62345900  | -3.80207600 | -0.02236500 |
| C | -2.81926400  | -4.98181000 | -0.03008700 |
| C | 8.88948200   | 1.97648600  | -0.04443800 |
| C | 9.69838600   | 0.86578800  | -0.08326000 |
| C | 6.87488800   | 0.53518000  | -0.09242600 |
| C | 7.73777200   | -0.59802100 | -0.15097700 |
| C | 4.78802200   | -0.85514400 | -0.08766500 |
| C | 2.71406500   | -2.22671400 | -0.06506700 |
| C | 3.48966500   | -3.45891900 | -0.07085500 |
| C | 0.62778100   | -3.56903100 | -0.04747200 |
| C | 1.40922800   | -4.78381700 | -0.05205300 |
| C | -1.44308400  | -4.92803700 | -0.03676200 |
| C | -0.63258800  | -6.12365200 | -0.04173200 |
| C | 9.11536400   | -0.41453700 | -0.14209900 |
| C | 7.21083600   | -2.01067600 | -0.22603600 |
| C | 4.88339700   | -3.44214200 | -0.08677000 |
| C | 2.78118600   | -4.69987800 | -0.06033400 |
| C | 0.71988900   | -6.05225000 | -0.04805700 |
| H | -9.90093500  | -2.58135900 | 0.01793100  |
| H | -7.69803000  | -3.69686200 | -0.00058800 |
| H | -5.50843700  | -4.82037800 | -0.01682800 |
| H | -3.31811300  | -5.94824600 | -0.02961800 |
| H | -1.13903600  | -7.08545500 | -0.03944300 |
| H | 9.75850000   | -1.28982300 | -0.18336100 |
| H | 7.51993900   | -2.49420700 | -1.16485800 |
| H | 5.38208400   | -4.41179100 | -0.07676900 |
| H | 3.36993800   | -5.61473400 | -0.06196100 |
| H | 1.32132400   | -6.95791000 | -0.05083400 |
| H | 2.76710700   | 6.15072700  | 0.03322700  |
| H | 4.95097700   | 5.04385900  | 0.01710500  |
| H | 7.13205200   | 3.96911400  | 0.00493300  |
| H | 9.31593400   | 2.97588300  | -0.00802200 |
| H | 10.77991500  | 0.96870000  | -0.07471400 |
| H | 0.57474400   | 7.28099200  | 0.05172200  |
| H | -11.24879900 | -0.49977600 | 0.03925500  |
| H | -8.07577000  | 3.08091100  | 0.04707200  |
| H | -10.14170400 | 1.71061500  | 0.04811000  |
| H | -1.88041100  | 7.14835000  | 0.05891400  |



|   |             |             |             |
|---|-------------|-------------|-------------|
| H | -3.93615300 | 5.79159700  | 0.05230800  |
| H | -6.00387900 | 4.44133700  | 0.04829000  |
| B | 5.61527700  | -2.13551200 | -0.12087100 |
| O | 8.06359900  | -3.96447800 | 0.57629200  |
| N | 7.78666100  | -2.82392800 | 0.89157100  |

BC2O-NH<sub>3</sub>:

# opt freq b3lyp/6-31g(d) scf=(maxcycle=500,xqc)

Title Card Required

0 1

|   |             |             |             |
|---|-------------|-------------|-------------|
| C | 0.99366100  | 6.24312300  | 0.09699700  |
| C | 3.09231700  | 4.92847700  | 0.10089900  |
| C | 5.19357400  | 3.62251900  | 0.10513900  |
| C | 7.29503100  | 2.31244000  | 0.10934400  |
| C | 9.39619500  | 0.99065300  | 0.11329900  |
| C | -0.36117300 | 6.28533100  | 0.07472700  |
| C | -1.15832500 | 5.07850500  | 0.03141500  |
| C | 1.71562700  | 4.98910400  | 0.07864000  |
| C | 0.94228300  | 3.76614200  | 0.03528100  |
| C | 3.80591100  | 3.68760000  | 0.08274400  |
| C | 3.03981600  | 2.46464700  | 0.03945700  |
| C | 5.89865000  | 2.38642300  | 0.08697400  |
| C | 5.13515600  | 1.16300400  | 0.04369300  |
| C | 7.98226400  | 1.07770900  | 0.09091500  |
| C | 7.22664400  | -0.14312400 | 0.04781800  |
| C | 10.04449000 | -0.24244700 | 0.09423600  |
| C | 9.32434100  | -1.43190800 | 0.05250600  |
| C | -2.53593700 | 5.10265000  | 0.00833200  |
| C | -3.32080300 | 3.90634200  | -0.03448000 |
| C | -0.45950600 | 3.80886400  | 0.01225000  |
| C | -1.21882700 | 2.59696300  | -0.03051800 |
| C | 1.63149700  | 2.50983800  | 0.01629300  |
| C | 0.87873800  | 1.29636100  | -0.02647700 |
| C | 3.72010900  | 1.21013000  | 0.02039400  |
| C | 2.96788300  | -0.00348800 | -0.02238300 |
| C | 5.80904400  | -0.09494700 | 0.02446600  |
| C | 5.05532600  | -1.30440100 | -0.01826400 |
| C | 7.90788700  | -1.41184800 | 0.02846300  |
| C | 7.14242500  | -2.59495900 | -0.01382600 |
| C | -4.71121300 | 3.92070000  | -0.05823700 |
| C | -5.47928400 | 2.72388800  | -0.10086900 |
| C | -2.62987200 | 2.63666600  | -0.05359800 |
| C | -3.38043700 | 1.42599700  | -0.09609900 |
| C | -0.53447000 | 1.34043300  | -0.04966600 |
| C | -1.28168800 | 0.12885900  | -0.09216000 |

|   |             |             |             |
|---|-------------|-------------|-------------|
| C | 1.55385500  | 0.03940800  | -0.04571000 |
| C | 0.80215400  | -1.17331600 | -0.08836400 |
| C | 3.64548100  | -1.26348900 | -0.04160900 |
| C | 2.89216000  | -2.47263300 | -0.08426400 |
| C | 5.73922300  | -2.57269200 | -0.03754100 |
| C | 4.97178400  | -3.76109700 | -0.07992900 |
| C | -6.87835000 | 2.72281100  | -0.12578900 |
| C | -7.63329300 | 1.52759300  | -0.16865500 |
| C | -4.79616100 | 1.45661500  | -0.11940400 |
| C | -5.54072200 | 0.24004600  | -0.16201400 |
| C | -2.69319900 | 0.17462000  | -0.11490200 |
| C | -3.44841300 | -1.03000300 | -0.15694600 |
| C | -0.60730300 | -1.13156000 | -0.11152200 |
| C | -1.35991700 | -2.34668600 | -0.15435200 |
| C | 1.48195000  | -2.43262500 | -0.10760700 |
| C | 0.72993800  | -3.64283600 | -0.15024200 |
| C | 3.57488700  | -3.74084600 | -0.10356600 |
| C | 2.80075900  | -4.93603700 | -0.14622800 |
| C | -9.04953400 | 1.56795900  | -0.19485000 |
| C | -9.78541300 | 0.38894800  | -0.23867800 |
| C | -6.96035700 | 0.26001400  | -0.18645400 |
| C | -7.72680800 | -0.97224000 | -0.23128000 |
| C | -4.84953400 | -1.00593700 | -0.17802900 |
| C | -2.77197600 | -2.29609800 | -0.17702500 |
| C | -3.51329100 | -3.51255100 | -0.21989800 |
| C | -0.68194100 | -3.60018500 | -0.17355500 |
| C | -1.44932300 | -4.81266100 | -0.21663900 |
| C | 1.41654700  | -4.91213800 | -0.16957300 |
| C | 0.62046300  | -6.11503900 | -0.21288100 |
| C | -9.14286500 | -0.84683300 | -0.25679200 |
| C | -7.10635800 | -2.24794500 | -0.25113900 |
| C | -2.84327000 | -4.74657500 | -0.23913600 |
| C | -0.73796200 | -6.06751500 | -0.23528400 |
| H | 9.83909800  | -2.38863100 | 0.03795800  |
| H | 7.65626300  | -3.55356300 | -0.02841400 |
| H | 5.48917200  | -4.71804100 | -0.09438300 |
| H | 3.31971700  | -5.89209300 | -0.16062900 |
| H | 1.13661600  | -7.07164500 | -0.22730600 |
| H | -9.73564700 | -1.75769600 | -0.29038400 |
| H | -7.77345400 | -3.10878800 | -0.29372600 |
| H | -3.44040900 | -5.65281800 | -0.27371000 |
| H | -1.31854000 | -6.98571500 | -0.26782500 |
| H | -3.05397500 | 6.05922800  | 0.02289400  |
| H | -5.23350100 | 4.87492000  | -0.04407100 |

|   |              |             |             |
|---|--------------|-------------|-------------|
| H | -7.40828800  | 3.67304200  | -0.11242200 |
| H | -9.55132400  | 2.53196700  | -0.18044500 |
| H | -10.87114000 | 0.43000900  | -0.25858600 |
| H | -0.88167700  | 7.23982100  | 0.08922600  |
| H | 11.13067600  | -0.27414900 | 0.11231800  |
| H | 7.87342800   | 3.23271400  | 0.14201400  |
| H | 9.97596200   | 1.90936500  | 0.14596000  |
| H | 1.57154600   | 7.16354500  | 0.12956000  |
| H | 3.66661200   | 5.85196600  | 0.13352600  |
| H | 5.76801200   | 4.54558400  | 0.13778900  |
| B | -5.61284000  | -2.31772800 | -0.22557800 |
| O | -4.85299600  | -3.52206900 | -0.24236700 |
| N | -6.05727700  | -3.35011200 | 3.15790700  |
| H | -5.51829600  | -4.04272200 | 2.63849900  |
| H | -5.38522900  | -2.63606000 | 3.43882100  |
| H | -6.64978500  | -2.90259600 | 2.45772000  |

BCO2-O<sub>2</sub>:

# opt freq ub3lyp/6-31g(d) scf=(maxcycle=500,xqc)

Title Card Required

0 2

|   |             |             |             |
|---|-------------|-------------|-------------|
| C | 1.12653300  | 6.25577900  | 0.06357300  |
| C | 3.21682500  | 4.91779300  | 0.08023900  |
| C | 5.30579800  | 3.58582700  | 0.07706000  |
| C | 7.39068200  | 2.25959100  | 0.05761100  |
| C | 9.48204000  | 0.93490100  | 0.02836700  |
| C | -0.22925600 | 6.31253000  | 0.03969000  |
| C | -1.03929800 | 5.11475000  | 0.02089900  |
| C | 1.83534500  | 4.99506300  | 0.06649200  |
| C | 1.05607600  | 3.78095100  | 0.05075400  |
| C | 3.90652000  | 3.67010000  | 0.07078600  |
| C | 3.13784000  | 2.45630100  | 0.04932300  |
| C | 5.98207500  | 2.34606500  | 0.05533500  |
| C | 5.21307000  | 1.13140400  | 0.02595100  |
| C | 8.06267400  | 1.02325800  | 0.02740500  |
| C | 7.29461100  | -0.18908600 | -0.00796500 |
| C | 10.11773700 | -0.30260400 | -0.00576000 |
| C | 9.38078300  | -1.48418100 | -0.04266900 |
| C | -2.42257700 | 5.15257900  | -0.01549300 |
| C | -3.21373500 | 3.96443400  | -0.03200300 |
| C | -0.35590100 | 3.84043800  | 0.03400500  |
| C | -1.11702800 | 2.63911400  | 0.02686800  |
| C | 1.72187200  | 2.51872000  | 0.04534700  |
| C | 0.96094800  | 1.31386800  | 0.02922100  |
| C | 3.79828000  | 1.19366800  | 0.02694200  |

|   |             |             |             |
|---|-------------|-------------|-------------|
| C | 3.03379400  | -0.01244700 | -0.00132300 |
| C | 5.87452900  | -0.13112000 | -0.00719000 |
| C | 5.11094300  | -1.33392000 | -0.04413200 |
| C | 7.95965500  | -1.46042500 | -0.04537500 |
| C | 7.18841300  | -2.63831700 | -0.08582500 |
| C | -4.61676200 | 3.98457200  | -0.09683100 |
| C | -5.38269100 | 2.79431600  | -0.11998300 |
| C | -2.53392100 | 2.69527800  | 0.00436400  |
| C | -3.28638500 | 1.49345300  | 0.01022200  |
| C | -0.45097200 | 1.37486300  | 0.02741300  |
| C | -1.20905400 | 0.17215400  | 0.02000500  |
| C | 1.61794400  | 0.04746100  | 0.00567400  |
| C | 0.85359300  | -1.15569700 | -0.02265800 |
| C | 3.69391500  | -1.27782800 | -0.03980500 |
| C | 2.92765300  | -2.47916600 | -0.08346000 |
| C | 5.77772800  | -2.60979800 | -0.08837400 |
| C | 4.99895300  | -3.78574600 | -0.13743900 |
| C | -6.79264700 | 2.77715400  | -0.23008800 |
| C | -7.53887200 | 1.57949600  | -0.29672900 |
| C | -4.69795000 | 1.53646000  | -0.04466600 |
| C | -5.42957200 | 0.32418500  | -0.02414600 |
| C | -2.61960400 | 0.23487900  | 0.02335100  |
| C | -3.38512200 | -0.96061500 | 0.05287400  |
| C | -0.56109100 | -1.09700300 | -0.00479100 |
| C | -1.33312300 | -2.30213200 | -0.04350700 |
| C | 1.51385700  | -2.42166600 | -0.07511000 |
| C | 0.74334400  | -3.61958500 | -0.13722600 |
| C | 3.59199400  | -3.75366200 | -0.14046800 |
| C | 2.80361800  | -4.93017100 | -0.20434200 |
| C | -8.94608700 | 1.57593700  | -0.50827800 |
| C | -9.60736900 | 0.37213500  | -0.64868700 |
| C | -6.84712200 | 0.32546000  | -0.18669000 |
| C | -7.54825800 | -0.91079200 | -0.33712400 |
| C | -4.77611900 | -0.90987600 | 0.10491600  |
| C | -2.74317400 | -2.23768100 | -0.01025800 |
| C | -3.53010800 | -3.43039900 | -0.12752900 |
| C | -0.67203200 | -3.55848100 | -0.13089400 |
| C | -1.46162000 | -4.74767600 | -0.22571300 |
| C | 1.40958400  | -4.88985900 | -0.21048700 |
| C | 0.59546500  | -6.07330000 | -0.29162200 |
| C | -8.92357500 | -0.85809400 | -0.57763800 |
| C | -2.86358300 | -4.65861900 | -0.24012200 |
| C | -0.76735900 | -6.00444200 | -0.30393400 |
| H | 9.88837600  | -2.44463900 | -0.07028800 |

|   |              |             |             |
|---|--------------|-------------|-------------|
| H | 7.69570400   | -3.59964200 | -0.11739000 |
| H | 5.50479900   | -4.74775400 | -0.17685900 |
| H | 3.30735700   | -5.89309700 | -0.25425100 |
| H | 1.09404500   | -7.03777500 | -0.34773600 |
| H | -9.45595100  | -1.79590900 | -0.69995100 |
| H | -3.46660300  | -5.55779000 | -0.32353400 |
| H | -1.35782600  | -6.91462200 | -0.37069400 |
| H | -2.92859500  | 6.11532100  | -0.03502200 |
| H | -5.12899100  | 4.94358200  | -0.13728500 |
| H | -7.32435700  | 3.72415000  | -0.29866000 |
| H | -9.47976700  | 2.51954000  | -0.57772500 |
| H | -10.68002200 | 0.36338100  | -0.82204300 |
| H | -0.73760100  | 7.27344100  | 0.03408300  |
| H | 11.20330400  | -0.34832800 | -0.00427700 |
| H | 7.97447400   | 3.17686100  | 0.08169100  |
| H | 10.06496600  | 1.85150900  | 0.05584500  |
| H | 1.71311400   | 7.17091800  | 0.07781000  |
| H | 3.80288300   | 5.83405800  | 0.09422500  |
| H | 5.89146400   | 4.50213600  | 0.09586200  |
| B | -5.61204800  | -2.23244200 | 0.32322400  |
| O | -4.86215200  | -3.40748600 | -0.17534200 |
| O | -6.94295800  | -2.10698200 | -0.29312400 |
| O | -5.91866900  | -2.45641900 | 1.79697800  |
| O | -4.80333300  | -2.62866400 | 2.50773600  |

BCO2-NO:

# opt freq b3lyp/6-31g(d) scf=(maxcycle=500,xqc)

Title Card Required

0 1

|   |             |             |            |
|---|-------------|-------------|------------|
| C | 1.05511100  | 6.26864600  | 0.07682200 |
| C | 3.15068600  | 4.94289900  | 0.08004100 |
| C | 5.24410500  | 3.62127100  | 0.08326800 |
| C | 7.33517700  | 2.29938500  | 0.08616600 |
| C | 9.43242000  | 0.97562500  | 0.08871300 |
| C | -0.30035500 | 6.31762200  | 0.05664700 |
| C | -1.10566500 | 5.11550000  | 0.01709200 |
| C | 1.77404400  | 5.01227100  | 0.05966600 |
| C | 0.99442100  | 3.79321700  | 0.01958000 |
| C | 3.85691500  | 3.69667000  | 0.06255200 |
| C | 3.08563100  | 2.47665200  | 0.02168800 |
| C | 5.93925100  | 2.37911400  | 0.06517900 |
| C | 5.17115800  | 1.15988200  | 0.02349200 |
| C | 8.01802900  | 1.06201700  | 0.06747000 |
| C | 7.25607600  | -0.15441800 | 0.02527000 |
| C | 10.07205300 | -0.25999700 | 0.06900000 |

|   |             |             |             |
|---|-------------|-------------|-------------|
| C | 9.34352500  | -1.44656600 | 0.02780300  |
| C | -2.48527800 | 5.14672000  | -0.00375300 |
| C | -3.28161600 | 3.95533900  | -0.04205700 |
| C | -0.40675400 | 3.84536500  | -0.00084100 |
| C | -1.17173800 | 2.63807200  | -0.03919000 |
| C | 1.67782000  | 2.53199700  | 0.00083800  |
| C | 0.92141200  | 1.32308700  | -0.03858300 |
| C | 3.75674500  | 1.21635800  | 0.00219200  |
| C | 2.99932000  | 0.00693200  | -0.03860400 |
| C | 5.83746400  | -0.10047600 | 0.00352600  |
| C | 5.07721300  | -1.30820500 | -0.03843400 |
| C | 7.92855800  | -1.42596300 | 0.00496900  |
| C | 7.15656600  | -2.60799600 | -0.03720200 |
| C | -4.67551000 | 3.97256500  | -0.06533300 |
| C | -5.45373700 | 2.77626500  | -0.10308400 |
| C | -2.58214500 | 2.68796900  | -0.05865100 |
| C | -3.33119600 | 1.48146400  | -0.09438500 |
| C | -0.49201700 | 1.37808300  | -0.05874100 |
| C | -1.23936500 | 0.17217000  | -0.09763300 |
| C | 1.58516000  | 0.06091200  | -0.05910400 |
| C | 0.82602300  | -1.14848400 | -0.09908600 |
| C | 3.66717200  | -1.25818300 | -0.05954200 |
| C | 2.90356900  | -2.46497600 | -0.10168200 |
| C | 5.75533700  | -2.58294900 | -0.05960900 |
| C | 4.97656600  | -3.76613300 | -0.10287900 |
| C | -6.85602800 | 2.74456600  | -0.13164800 |
| C | -7.59887400 | 1.53355200  | -0.17638900 |
| C | -4.74932100 | 1.52038500  | -0.11401200 |
| C | -5.47009500 | 0.30686300  | -0.14600900 |
| C | -2.64893900 | 0.23013900  | -0.11546500 |
| C | -3.40089700 | -0.97240200 | -0.14720100 |
| C | -0.58118500 | -1.09551100 | -0.11756200 |
| C | -1.34483000 | -2.30773100 | -0.15649900 |
| C | 1.49508400  | -2.41510100 | -0.12159800 |
| C | 0.73024300  | -3.61948900 | -0.16519500 |
| C | 3.57922200  | -3.73827900 | -0.12485300 |
| C | 2.79224300  | -4.92508400 | -0.17027200 |
| C | -9.01950100 | 1.49539700  | -0.21732400 |
| C | -9.68142200 | 0.28517300  | -0.26938700 |
| C | -6.89119700 | 0.28756000  | -0.18449500 |
| C | -7.60135900 | -0.94784000 | -0.24126100 |
| C | -4.78977400 | -0.92610100 | -0.15005700 |
| C | -2.75310600 | -2.24811700 | -0.17019800 |
| C | -3.51971200 | -3.45045800 | -0.21539700 |

|   |              |             |             |
|---|--------------|-------------|-------------|
| C | -0.68220000  | -3.56665400 | -0.18359900 |
| C | -1.46805800  | -4.76708900 | -0.23175300 |
| C | 1.40579100   | -4.89060000 | -0.19162900 |
| C | 0.59458300   | -6.08298300 | -0.24005600 |
| C | -8.98373300  | -0.94324600 | -0.28430800 |
| C | -2.86773100  | -4.68799600 | -0.25141500 |
| C | -0.76560000  | -6.02535600 | -0.26015400 |
| H | 9.85621900   | -2.40461700 | 0.01264400  |
| H | 7.66803100   | -3.56773000 | -0.05292400 |
| H | 5.48774800   | -4.72617700 | -0.11981900 |
| H | 3.30258700   | -5.88574400 | -0.18915800 |
| H | 1.09978300   | -7.04549500 | -0.26096300 |
| H | -9.51400700  | -1.88869700 | -0.32944300 |
| H | -3.46932300  | -5.59084900 | -0.29439400 |
| H | -1.35074300  | -6.94065800 | -0.29724300 |
| H | -2.99507000  | 6.10782300  | 0.00935900  |
| H | -5.19147000  | 4.93025500  | -0.05551200 |
| H | -7.40464900  | 3.68389400  | -0.12331400 |
| H | -9.57637900  | 2.42849700  | -0.20951000 |
| H | -10.76739800 | 0.26747000  | -0.30140900 |
| H | -0.81425800  | 7.27574200  | 0.07015300  |
| H | 11.15809200  | -0.30008100 | 0.08594100  |
| H | 7.91728100   | 3.21762400  | 0.11781600  |
| H | 10.01402600  | 1.89309400  | 0.12071100  |
| H | 1.63604300   | 7.18730400  | 0.10670200  |
| H | 3.73124800   | 5.86257100  | 0.11048300  |
| H | 5.82606200   | 4.53981100  | 0.11433700  |
| B | -5.57381500  | -2.21558400 | -0.17678500 |
| O | -4.88246300  | -3.42663100 | -0.26815200 |
| O | -6.95225300  | -2.16945300 | -0.26359500 |
| O | -4.15579700  | -2.98962900 | 2.51734100  |
| N | -5.14216800  | -2.39719100 | 2.38423700  |

BCO2-NH<sub>3</sub>:

# opt freq ub3lyp/6-31g(d) scf=(maxcycle=500,xqc)

Title Card Required

0 2

|   |             |            |            |
|---|-------------|------------|------------|
| C | 1.00507200  | 6.22917200 | 0.03019700 |
| C | 3.11188700  | 4.91553400 | 0.04839600 |
| C | 5.21488100  | 3.60877700 | 0.05237800 |
| C | 7.31219000  | 2.30248800 | 0.04395600 |
| C | 9.41676300  | 0.99549200 | 0.02742400 |
| C | -0.35410400 | 6.27137700 | 0.01264100 |
| C | -1.14893100 | 5.06741600 | 0.00342100 |
| C | 1.72504700  | 4.97884400 | 0.03702500 |

|   |             |             |             |
|---|-------------|-------------|-------------|
| C | 0.95923700  | 3.75970200  | 0.02910500  |
| C | 3.81401200  | 3.67913800  | 0.04622700  |
| C | 3.05473200  | 2.45615100  | 0.03403300  |
| C | 5.90633900  | 2.37543100  | 0.04100500  |
| C | 5.14775700  | 1.15049800  | 0.02287700  |
| C | 7.99768500  | 1.07029200  | 0.02591700  |
| C | 7.24411700  | -0.14857900 | 0.00337100  |
| C | 10.06604800 | -0.23541600 | 0.00621100  |
| C | 9.34104000  | -1.42497600 | -0.01767100 |
| C | -2.53887500 | 5.09076600  | -0.02140300 |
| C | -3.31837700 | 3.90081100  | -0.02886400 |
| C | -0.45340900 | 3.80539400  | 0.01632600  |
| C | -1.20795500 | 2.59573800  | 0.01430300  |
| C | 1.64134300  | 2.50382200  | 0.02973000  |
| C | 0.89047100  | 1.28930800  | 0.02099000  |
| C | 3.73025400  | 1.19816500  | 0.02238400  |
| C | 2.97952600  | -0.01444600 | 0.00528100  |
| C | 5.82107600  | -0.10452400 | 0.00301400  |
| C | 5.06884600  | -1.31531200 | -0.02072800 |
| C | 7.92144900  | -1.41299100 | -0.02014900 |
| C | 7.16110200  | -2.60000200 | -0.04693900 |
| C | -4.72581400 | 3.90885000  | -0.07101500 |
| C | -5.49041300 | 2.71308700  | -0.08214400 |
| C | -2.62110900 | 2.64007500  | -0.00056000 |
| C | -3.36695000 | 1.42680100  | 0.00792600  |
| C | -0.52508900 | 1.33653900  | 0.01891400  |
| C | -1.26839300 | 0.12793400  | 0.01745400  |
| C | 1.56001600  | 0.03154600  | 0.00966200  |
| C | 0.80721100  | -1.18009300 | -0.00655200 |
| C | 3.65334400  | -1.27338300 | -0.01824700 |
| C | 2.89781600  | -2.48585900 | -0.04724600 |
| C | 5.74985700  | -2.58690300 | -0.04968400 |
| C | 4.98673300  | -3.77037900 | -0.08335000 |
| C | -6.89637900 | 2.67808400  | -0.15138100 |
| C | -7.63435500 | 1.46184200  | -0.19620300 |
| C | -4.78372600 | 1.45861500  | -0.02557000 |
| C | -5.50023500 | 0.23902000  | 0.00105800  |
| C | -2.68362500 | 0.17876800  | 0.02187000  |
| C | -3.43552700 | -1.02532000 | 0.05507100  |
| C | -0.60486200 | -1.13458500 | 0.00759600  |
| C | -1.36459900 | -2.35219200 | -0.01676600 |
| C | 1.48314500  | -2.44278300 | -0.04111900 |
| C | 0.72865700  | -3.64926400 | -0.08517700 |
| C | 3.57518500  | -3.75407500 | -0.08660800 |



|   |              |             |             |
|---|--------------|-------------|-------------|
| C | 2.80266800   | -4.93761600 | -0.13237100 |
| C | -9.04575800  | 1.42804300  | -0.34586700 |
| C | -9.70342400  | 0.21567800  | -0.44385900 |
| C | -6.92797800  | 0.21915900  | -0.11312600 |
| C | -7.62546000  | -1.01915900 | -0.22471400 |
| C | -4.82245300  | -0.98454400 | 0.09903700  |
| C | -2.77755000  | -2.30312300 | 0.01143700  |
| C | -3.53676000  | -3.50515900 | -0.08067100 |
| C | -0.69389900  | -3.60365400 | -0.07995100 |
| C | -1.46579200  | -4.80283000 | -0.15093000 |
| C | 1.40576500   | -4.91095700 | -0.13788000 |
| C | 0.60446400   | -6.10377200 | -0.19884400 |
| C | -9.00617500  | -1.00735800 | -0.39148800 |
| C | -2.87382400  | -4.72770700 | -0.15938600 |
| C | -0.75938800  | -6.05250400 | -0.20927600 |
| H | 9.85769700   | -2.38104600 | -0.03533400 |
| H | 7.67822000   | -3.55660700 | -0.06776100 |
| H | 5.50227100   | -4.72769900 | -0.11063800 |
| H | 3.31598100   | -5.89616200 | -0.16884500 |
| H | 1.11419600   | -7.06331500 | -0.24268000 |
| H | -9.52866900  | -1.95413700 | -0.48556200 |
| H | -3.46689400  | -5.63504900 | -0.23184500 |
| H | -1.33884700  | -6.97104300 | -0.26310500 |
| H | -3.05196500  | 6.05011100  | -0.03848300 |
| H | -5.24430700  | 4.86469500  | -0.10370900 |
| H | -7.44464200  | 3.61627800  | -0.20257000 |
| H | -9.59770900  | 2.36255400  | -0.40136400 |
| H | -10.78284800 | 0.19780900  | -0.57000900 |
| H | -0.87202600  | 7.22747100  | 0.00458900  |
| H | 11.15229400  | -0.26941100 | 0.00755500  |
| H | 7.88784500   | 3.22523100  | 0.05871300  |
| H | 9.99071900   | 1.91828500  | 0.04481600  |
| H | 1.58136400   | 7.15125200  | 0.03673700  |
| H | 3.68689600   | 5.83911900  | 0.05549100  |
| H | 5.79082400   | 4.53143900  | 0.06312000  |
| B | -5.62473200  | -2.30412600 | 0.25245300  |
| O | -4.90212500  | -3.49939600 | -0.09822700 |
| O | -6.98891200  | -2.23042400 | -0.18577400 |
| N | -5.85601700  | -2.56152500 | 2.03605600  |
| H | -6.38176900  | -1.79742200 | 2.46259500  |
| H | -4.96763500  | -2.65086100 | 2.53092200  |
| H | -6.38418500  | -3.42499800 | 2.17173900  |
